# Supplementary material for: Astragalus mongholicus Bunge and Panax notoginseng formula (A&P) improves renal mesangial cell damage in diabetic nephropathy by inhibiting the inflammatory response of infiltrated macrophages
Source: PubMed Central journal article supplement (PMC8781170; doi:10.1186/s12906-021-03477-x), 2022-01-20
Supplement: 12906_2021_3477_MOESM2_ESM.pdf [file 12906_2021_3477_MOESM2_ESM.pdf]

The RAW data of WB results

Figure 2

NF $\kappa$ B

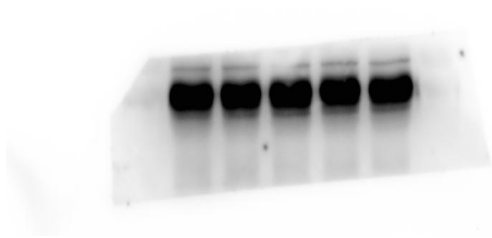

p-NF $\kappa$ B

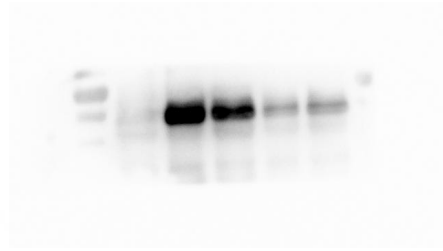

IL-6

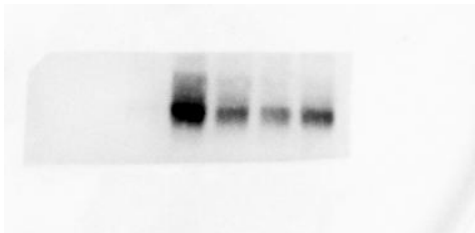

IL-1 $\beta$

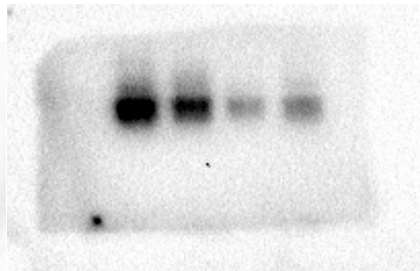

TNF- $\alpha$

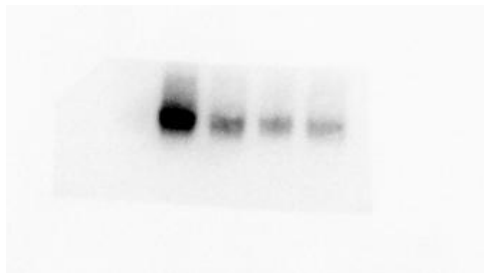

$\beta$ -actin

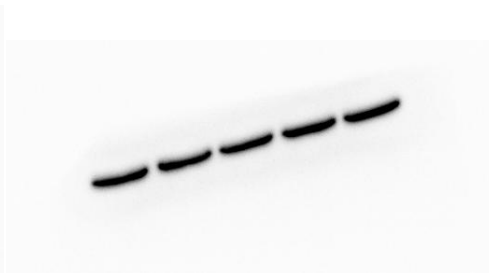

The above images are the RAW data of the WB results in Figure 2, each image corresponds to the WB band in Figure 2.

Figure 3

$\beta$ -actin

Mincle

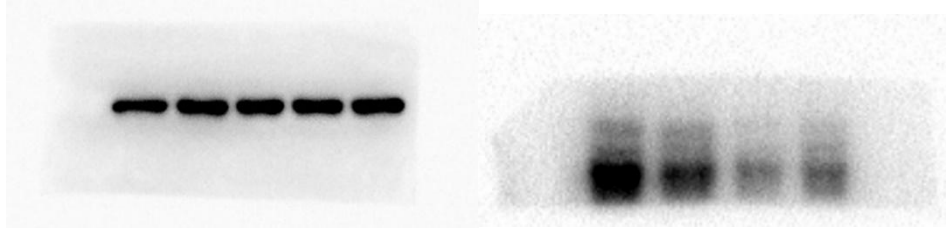

The above images are the RAW data of the WB results in Figure 3, each image corresponds to the WB band in Figure 3.

Figure 4

p-NFκB

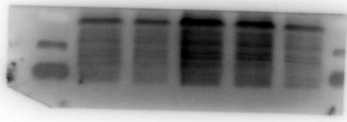

NFκB

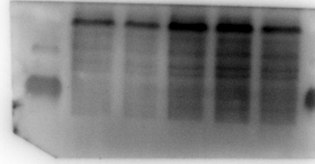

Card9

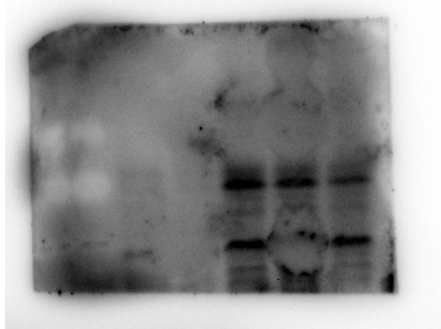

Mincle

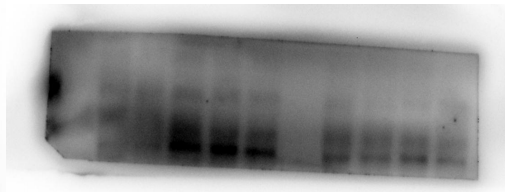

TNF-α

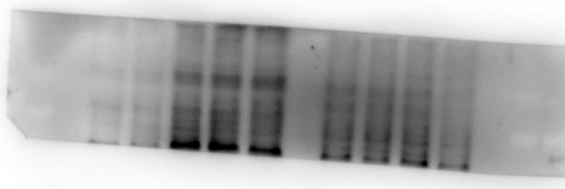

IL-1β

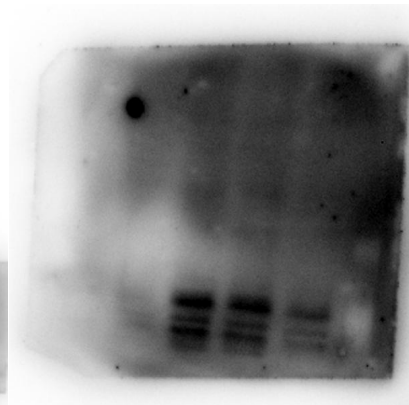

β-actin

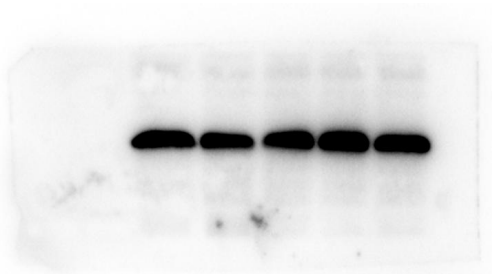

The above images are the RAW data of the WB results in Figure 4, each image corresponds to the WB band in Figure 4.

Figure 5

p-NF $\kappa$ B

NF $\kappa$ B

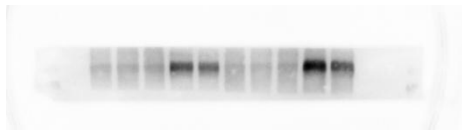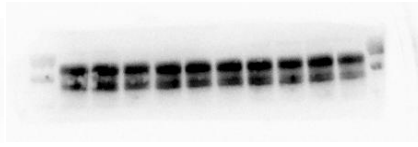

IL-1 $\beta$

IL-6

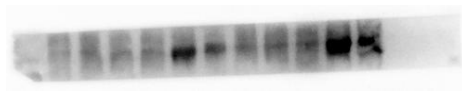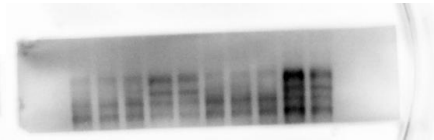

TNF- $\alpha$

$\beta$ -actin

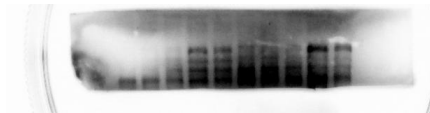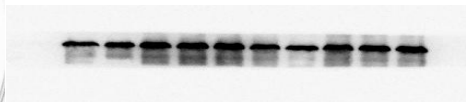

The above images are the RAW data of the WB results in Figure 5, each image corresponds to the WB band in Figure 5.

Figure 6

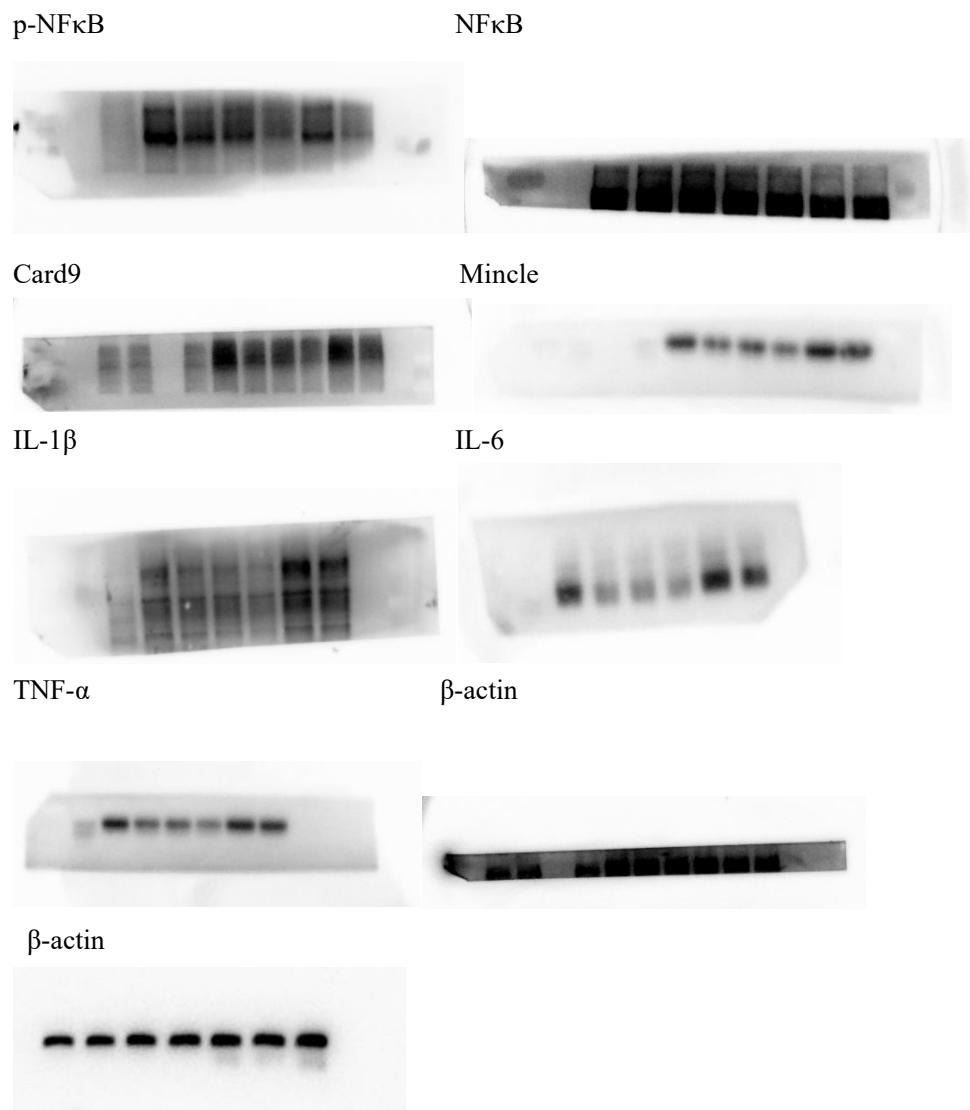

The above images are the RAW data of the WB results in Figure 6, each image corresponds to the WB band in Figure 6.

Supplementary figure

Mincle

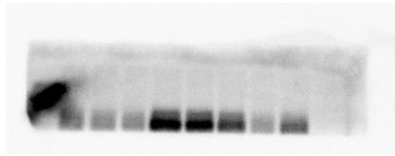

$\beta$ -actin

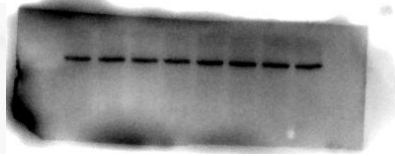

The above images are the RAW data of the WB results in Supplementary figure1, each image corresponds to the WB band in Supplementary figure1.
